1 DNA, Morphology, and Ecology Resurrect Previously Synonymized Species of North American  
2 *Stereum* and Suggest Extensive Undescribed Global Diversity

3 Sarah DeLong-Duhon<sup>1</sup>, Robin K. Bagley<sup>2</sup>, and Andrew A. Forbes<sup>1</sup>

4 *1 Department of Biology, The University of Iowa, Iowa City, IA 52245 USA*

5 *2 Department of Evolution, Ecology, and Organismal Biology, The Ohio State University at*

6 *Lima, Lima, OH 43210 USA*

7 Corresponding Author: Sarah DeLong-Duhon, [sarah-delong-duhon@uiowa.edu](mailto:sarah-delong-duhon@uiowa.edu), 850-797-7283

## 8 **Abstract**

9 *Stereum* is an exceedingly common but taxonomically confounding genus of basidiomycete  
10 fungus with a cosmopolitan distribution. Lack of consensus about morphological and geographic  
11 boundaries of many *Stereum* species has resulted in a lack of consistency in identification of  
12 physical specimens, a problem that cascades to their associated published DNA sequences. A  
13 critical initial step towards addressing these issues is determining the scope of the problem. Here,  
14 we first use integrative taxonomy to delimit species in the North American *Stereum ostrea*  
15 complex. We use morphological and ecological characters, alongside ITS rDNA sequences of  
16 specimens from midwestern and eastern North America to show that “*Stereum ostrea*” in this  
17 region is a complex of at least three reproductively isolated sister species: *S. lobatum*, *S.*  
18 *fasciatum*, and *S. subtomentosum*. We then extend lessons from this case study to a set of  
19 publicly available *Stereum* ITS sequences to assess the accuracy of species names represented by  
20 existing sequence data. ASAP species delimitation successfully discriminates among the three  
21 newly revealed species in the *S. ostrea* species complex, but also reveals considerable cryptic  
22 diversity across global *Stereum* and widespread inconsistency in application of species names.

Delong-Duhon SG, Bagley RK, & Forbes AA

23 Though ITS alone should not be used to delimit species or describe evolutionary relationships,  
24 its application here helps direct new hypotheses and suggests several areas of *Stereum* taxonomy  
25 that require revision. The critical future work of disentangling *Stereum* taxonomy and evolution  
26 should combine a multilocus genetic approach with morphology, ecology, and a global sampling  
27 strategy.

28 Key words: Stereaceae, ITS, ASAP, systematics, taxonomy, biodiversity

29 The most recent estimate of global fungal diversity predicts that there are 2.2 to 3.8 million  
30 species of fungi, but only ~120,000 have been formally described, and fewer than 23,000 have  
31 ITS sequences available on NCBI GenBank (Hawksworth and Lücking 2017; Vu et al. 2014).  
32 New species of fungi are often discovered as cryptic lineages previously lumped under single,  
33 well-established names (e.g., for *Amanita muscaria* and *Cantharellus cibarius* species  
34 complexes; Geml et al. 2006; Buyck and Hofstetter 2011). While the members of some species  
35 complexes may initially be difficult to separate morphologically, features useful in  
36 discriminating among species can become clear after phylogenetic analysis and trait-mapping  
37 (e.g., Peintner et al. 2019). Critically, the differences among cryptic species can be economically  
38 relevant, such as with the fungal plant pathogen *Magnaporthe grisea* and the morphologically  
39 indistinguishable *M. oryzae*, which infect crabgrass – a common invader of residential lawns –  
40 and rice, respectively (Couch and Kohn 2002).

41 A second complication presented by incomplete understanding of species boundaries  
42 among fungi is the lost opportunity to study the circumstances underlying their diversity. Fungi  
43 are not only incredibly speciose, but also morphologically and ecologically diverse, with similar  
44 species often occupying different habitats/substrates (Seitzman et al. 2011, Wibberg et al. 2021).  
45 In this way, they present fantastic systems to explore how divergent selection along a variety of

## CRYPTIC DIVERSITY IN *STEREUM*

46 ecological axes might influence their biodiversity. However, given the absence of robust  
47 taxonomic resources and a subsequent lack of understanding of where one species begins and  
48 another ends, questions about fungal evolution are all but impenetrable.

49         One understudied fungal group that may harbor many undiscovered species and that may  
50 be a good candidate for future ecological speciation research is *Stereum*, a diverse genus of shelf-  
51 like wood-decay fungi in the Russulales order that is common in wooded biomes throughout the  
52 world. Though *Stereum* has been the focus of extensive bioprospecting (Doljak et al. 2006;  
53 Hybelhauerová et al. 2008; Tian et al. 2020), and some economically important species are  
54 relatively well-researched (Stenlid and Vasiliauskas 1998; Čermák et al. 2004), the below-genus  
55 level taxonomy of *Stereum* has not been subjected to rigorous phylogenetic analysis. This  
56 disconnect between the slow progress toward molecular taxonomy in *Stereum* and interest in the  
57 potentially useful properties of specific *Stereum* species can be problematic, especially where  
58 species descriptions include uninformative or deceptive morphological characters that may lead  
59 to misidentification of study specimens.

60         *Stereum ostrea* is an exemplar of a species with a fraught taxonomic history (Lloyd 1913).  
61 While the name *S. ostrea* has been applied to collections around the world, it is unlikely that  
62 these varied collections belong to a single phylogenetic species given pre-Anthropocene  
63 obstacles to dispersal. First used to describe a collection from the island of Java in Indonesia, the  
64 name *S. ostrea* has been consistently applied to specimens from North America since a  
65 publication by Lentz (1955) placed it in synonymy with two other putative species, *S. fasciatum*  
66 and *S. lobatum*, with which Welden (1971) and Chamuris (1985, 1988) concurred. Even before  
67 this, *S. ostrea* was considered either a synonym of *S. fasciatum* (Burt 1920; Pilát 1930; Banerjee  
68 1935; Hendrickx 1948) or of *S. lobatum* (Masseé 1890; Cooke 1892; Höhnelt and Litschauer

Delong-Duhon SG, Bagley RK, & Forbes AA

69 1907; Reinking 1920; Boedijn 1940). Demoulin (1985) argued in favor of *S. fasciatum* and  
70 *S. lobatum* being two species, distinct from one another and from *S. ostrea*, but the  
71 literature remained divided (Eicker and Louw 1998). Currently, *S. fasciatum* is considered  
72 a synonym of *S. ostrea* (Species Fungorum, February 2022,  
73 <http://www.speciesfungorum.org/>), and despite being an accepted name, *S. lobatum* is  
74 rarely used. Another similar species, *S. subtomentosum*, has both been confused with *S.*  
75 *fasciatum* and proposed as belonging to a species complex with *S. hirsutum* (Pouzar 1964;  
76 Welden 1971; Chamuris 1988; Ginns and Lefebvre 1993).

77 We sought to 1) test the hypothesis that “*S. ostrea*” in North America is not a single  
78 species but a complex of several species and 2) to use thresholds of sequence divergence  
79 shown to separate putative species in this case study of *S. ostrea*, with the overall goal of  
80 interrogating the potential scale of unrealized global *Stereum* diversity. We collected >50  
81 *Stereum* specimens from eastern North America, documented their morphology and  
82 ecology, and collected nuclear rDNA ITS1-5.8S-ITS2 (internal transcribed spacer barcode)  
83 sequence data. We also used our sequence data, 13 sequences from the New Zealand  
84 Fungarium (PDD), and 415 ITS sequences tagged as *Stereum* that we harvested from  
85 online sequence repositories, for a preliminary analysis of global cryptic species diversity  
86 in *Stereum*. Overall, we find support for multiple species within *S. ostrea* as well as  
87 evidence of rampant misidentification of species within global datasets. These findings are  
88 a first step toward creating a robust global phylogeny for the genus *Stereum*.

## 89 **Materials and Methods**

### 90 **Collection and identification**

## CRYPTIC DIVERSITY IN *STEREUM*

91           We collected 36 *Stereum* basidiocarps from sites in midwestern and eastern North  
92   America, with the most intensive sampling in Iowa and some supplemental collections made in  
93   Alabama and Florida (Supplementary Table 1). For identification we used the dichotomous key  
94   and morphological descriptions from Chamuris (1988), the most comprehensive recent  
95   publication on *Stereum*. Based on morphology, we initially identified our collections as *S. ostrea*,  
96   *S. hirsutum*, *S. complicatum*, *S. gausapatum*, *S. sanguinolentum*, and *S. striatum*. We used  
97   iNaturalist to record photographs, dates of collection, and approximate GPS coordinates of  
98   collection location (Supplementary Table 1). We also recorded the substrate from which samples  
99   were collected, whether substrate was hardwood or conifer, and if the hymenium of the  
100   mushrooms changed color when bruised. We air dried all collections and preserved samples in  
101   polyethylene plastic bags.

### 102   **High Resolution Imaging**

103           We photographed exemplar *Stereum* with a Canon EOS 60D camera and a Canon MP-E  
104   65mm macro lens (Canon USA, Melville, NY) mounted on a StackShot automated macro rail  
105   (Cognisys Inc., Traverse City, MI). Images were processed in Zerene Stacker software using  
106   PMax method (Zerene Systems LLC, Richland, WA).

### 107   **DNA extraction, PCR and sequencing**

108           We used a CTAB and liquid nitrogen method adapted from Chen et al. (2010) to extract  
109   DNA from 3 x 3 mm pieces of basidiocarp from each collection, taking care to exclude as much  
110   dirt and debris as possible. We used DNA diluted 1:20 with molecular grade water for PCR  
111   amplification using ITS1-F (CTTGGTCATTTAGAGGAAGTAA) and ITS4  
112   (TCCTCCGCTTATTGATATGC) primers with the following thermocycler program: 3 min @ 94

Delong-Duhon SG, Bagley RK, & Forbes AA

113 C, 25 cycles (30 s @ 94 C, 30 s @ 55 C, 30 s @ 72 C), 2 min @ 72 C (White et al. 1990; Gardes  
114 and Bruns 1993). We cleaned PCR products with Exo-SAP following manufacturer protocols,  
115 then sequenced PCR products for both forward and reverse directions on an Applied Biosystems  
116 ABI 3730 DNA Analyzer (Thermo Fisher Scientific, Massachusetts) housed in the Roy J. Carver  
117 Center for Genomics in the University of Iowa Biology Department.

## 118 **Phylogenetic analysis**

119 We used Geneious 8.1.7 (<http://www.geneious.com/>) for alignment of forward and reverse  
120 sequences for each collection, which we then manually checked and trimmed. We chose  
121 *Xylobolus subpileatus*, another member of the Stereaceae, as an outgroup. This specimen was  
122 collected in Florida by S.G.D. and sequenced by the Smith Lab at the University of Florida. We  
123 also obtained North American and Eurasian *S. hirsutum* sequences from Barcode of Life  
124 Database (BOLD) and GenBank. We used MAFFT (Katoh et al. 2002) via the CIPRES server  
125 (Miller et al. 2010) to align chosen sequences, then generated a maximum likelihood tree using  
126 RAxML (Stamatakis 2014) via CIPRES. For computation of the Bayesian tree in Supplementary  
127 Figure 1, we used MrBayes 3.2.7 (Ronquist et al. 2012) with a GTR+I+F substitution model for  
128 200,000 generations, with sampling every 100 generations. Sequences generated during this  
129 study were deposited in the GenBank database (Supplementary Table 1). Alignment and tree  
130 files were deposited to Treebase (Submission ID: 27646).

## 131 **ASAP Species Delimitation**

132 We downloaded all available sequences from GenBank on October 18<sup>th</sup>, 2021, using the  
133 search parameters "Stereum"[Organism] AND "internal transcribed spacer"[All Fields], for a  
134 total of 547 sequences. We also retrieved 13 *Stereum* sequences from BOLD, used 13 sequences

## CRYPTIC DIVERSITY IN *STEREUM*

135 from the New Zealand Fungarium (PDD) courtesy of Dr. Jerry Cooper, and included 32 of the 36  
136 *Stereum* sequences we generated for this study (Supplementary Table 2). Four of our sequences  
137 were not used due to inadequate sequence length.

138         After an initial alignment using MAFFT we discarded sequences that were a) not  
139 *Stereum*, b) of low-quality, and c) were missing more than ~30bp of the final trimmed sequence  
140 length of the alignment. Examples of sequences found to not to be *Stereum* (16 total) were  
141 *Trametes hirsuta*, *Penicillium*, *Scytinostroma*, and *Khuskia*, according to the closest GenBank  
142 BLAST matches. Sequences were presumed to be of low quality where there were significant  
143 random-seeming changes in the highly conserved 5.8S region or other smaller regions that are  
144 conserved among all other *Stereum* ITS sequences. Sequences were pared down to ensure no  
145 large gaps on either end of the alignment to increase accuracy of Assemble Species by  
146 Automatic Partitioning (ASAP), and sequences missing more than 30bp on either end of the final  
147 alignment were discarded (67 total). In total, these filters removed ~100 specimens. We  
148 realigned the remaining 460 sequences with MAFFT and ran an ASAP analysis via the web  
149 portal (<https://bioinfo.mnhn.fr/abi/public/asap/>) with default parameters: substitution model  
150 Jukes-Cantor (JC69) (Puillandre et al. 2021). Output files were downloaded and used to create  
151 Figure 4. Metadata for sequences in the final alignment can be found in Supplementary Table 2.  
152 To create a preliminary sense of how putative *Stereum* species might be related, we inferred a  
153 neighbor-joining phylogeny using a Jukes-Cantor distance model and aligned ASAP species  
154 groupings with its tips.

Delong-Duhon SG, Bagley RK, & Forbes AA

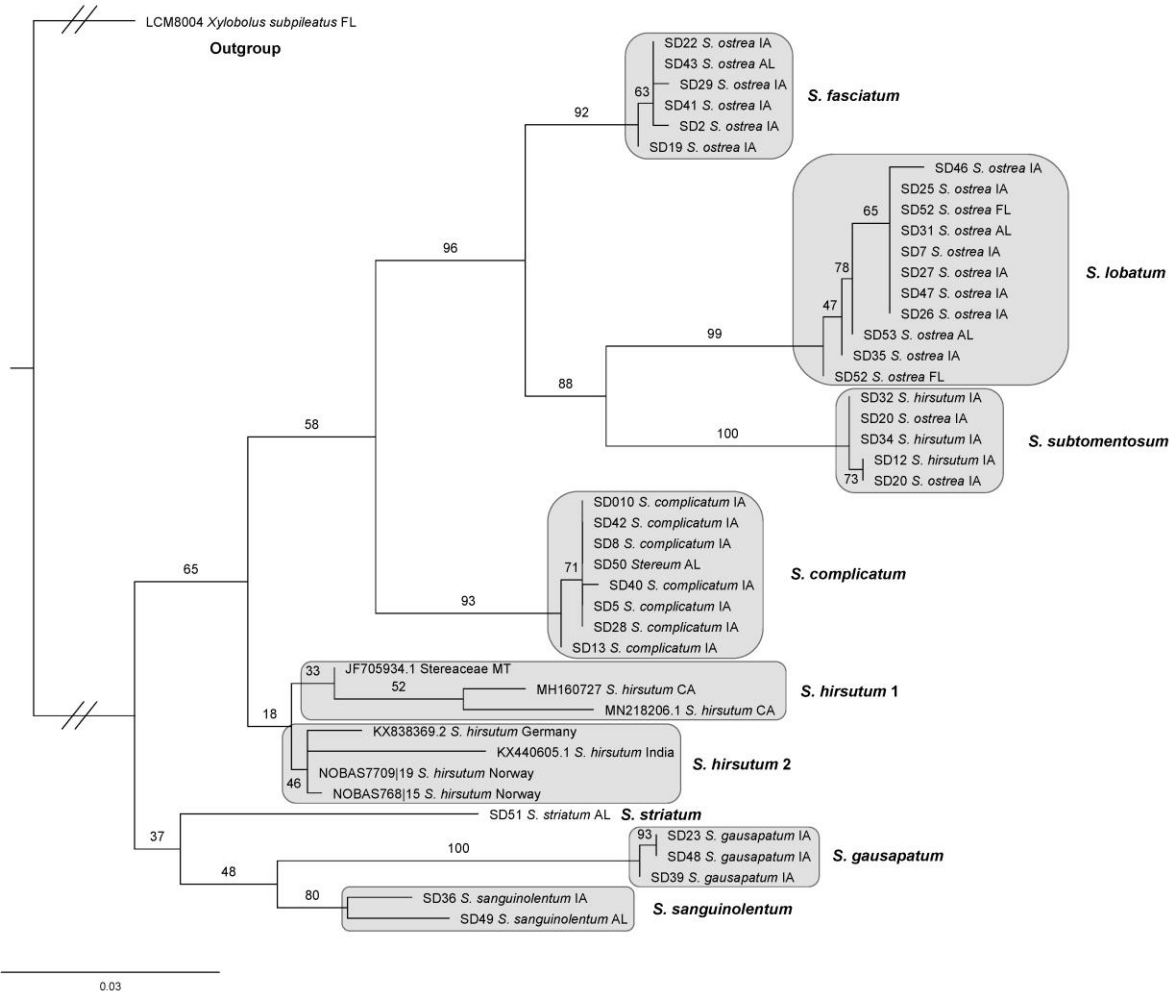

155

156

## 157 Results

158 For our new North American *Stereum* collections, maximum likelihood (Fig. 1) and  
159 Bayesian trees (Supplementary Fig. 1) were largely in agreement, with the sole exception being  
160 the placement of the single *Stereum striatum* sequence. Both trees show *Stereum* sorting out into  
161 several clades. Specimens initially identified as *S. ostrea* formed one large monophyletic group  
162 with three individuals initially identified as *S. hirsutum*, but this was split further into three  
163 smaller, well-differentiated clades (Fig. 1). Sequences within each clade differed from one  
164 another by 1–3%, while sequences among the three clades differed from one another by 7–14%.



## CRYPTIC DIVERSITY IN *STEREUM*

165 The specimens in the first of the three subclades (Fig. 1) all share features of the previously  
166 synonymized species *S. fasciatum*, as defined by many authors including Burt (1920) and  
167 Demoulin (1985). These specimens feature a cap clothed in coarse hair that is resistant to  
168 wearing off in bands, and with these hairs gathered in individual clumps that are best observed  
169 with a hand lens or dissecting microscope (Fig. 2a–c). If bruised (when basidiocarps are fresh) or  
170 wetted (when basidiocarps are dry) the smooth hymenium (undersurface) appears wet but does  
171 not stain color (Fig. 3a).

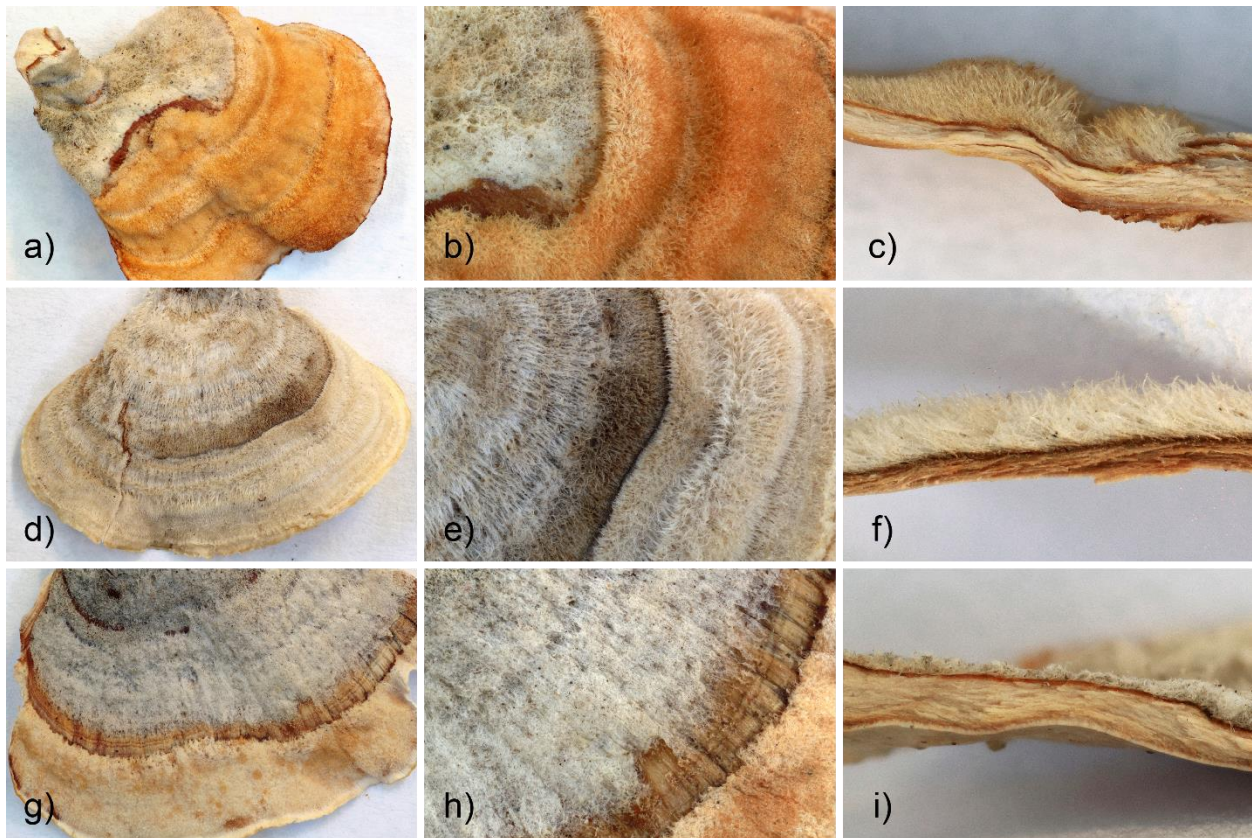

172  
173 Similarly, the specimens in the second clade (Fig. 1) showed features consistent with the  
174 previously synonymized *S. lobatum* (Burt 1920; Demoulin 1985). The cap is clothed in matted,  
175 felted hairs that quickly begin wearing off, from the edge of the cap inwards, in concentric bands  
176 exposing the shiny chestnut-brown context beneath (Fig. 2d–f). Importantly, the short cap hairs

Delong-Duhon SG, Bagley RK, & Forbes AA

177 are matted and tangled together in such a way that individual hairs are very difficult to observe.  
178 When bruised or wetted the hymenium stains a bright yellow color (Fig. 3b).

179         Specimens in the third clade shared some features with both *S. fasciatum* and *S. lobatum*,  
180 however the basidiocarps were usually thicker, more irregular (i.e., growth zones not evenly  
181 concentric, caps radially folded and overlapping), and both cap and hymenium often a richer  
182 coffee-brown color. The cap is covered in clumping hairs that are typically longer and woolier  
183 than *S. fasciatum* and wear off in bands more readily but not to the extent of *S. lobatum* (Fig. 2g–  
184 i). When bruised or wetted the hymenium stains a bright yellow color like *S. lobatum* (Fig. 2b).  
185 Overall, the morphology agrees with descriptions of *S. subtomentosum* (Pouzar 1964; Chamuris  
186 1988).

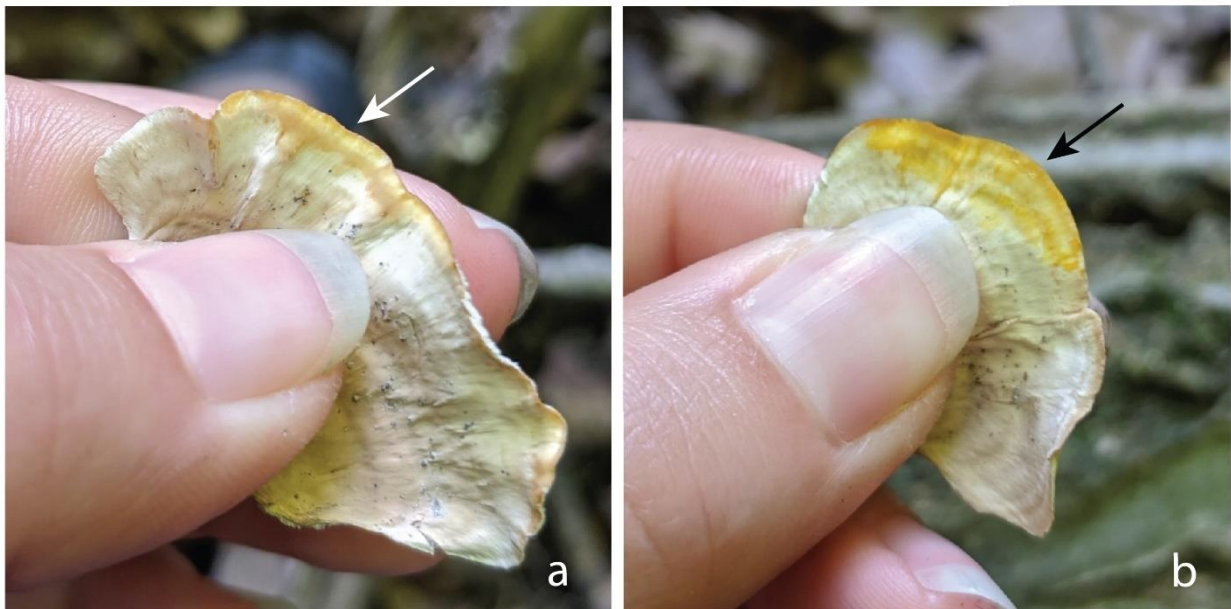

187

188         Specimens identified before sequencing as belonging to other species of *Stereum*,  
189 including *S. complicatum*, *S. gausapatum*, and *S. sanguinolentum*, formed reciprocally  
190 monophyletic clades with ITS sequences differing within clades by 1–5% (Fig. 1). The single  
191 sequence of *S. striatum* was placed differently in the two trees but differed from all other

## CRYPTIC DIVERSITY IN *STEREUM*

192 sequences by more than 7%. *S. hirsutum* sequences acquired from GenBank and BOLD  
193 databases differed from one another by 1–6%, but only as much as 4% within the two  
194 geographically isolated (North America vs. Eurasia) clades.

Delong-Duhon SG, Bagley RK, & Forbes AA

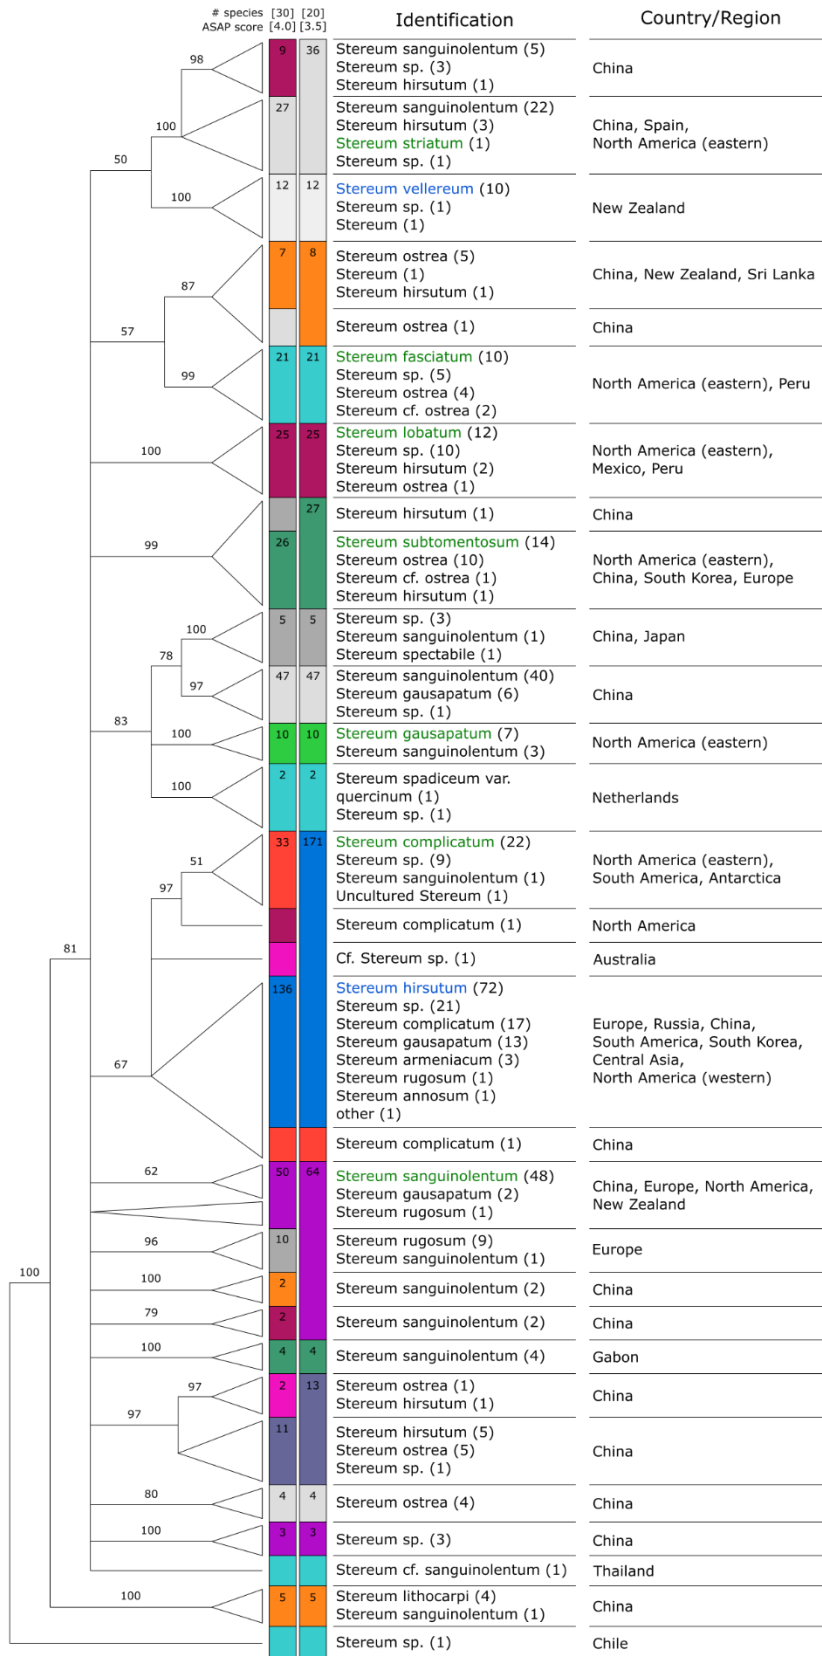

## CRYPTIC DIVERSITY IN *STEREUM*

196            ASAP species delimitation results for the 415 sequences downloaded from databases, plus  
197            our own samples and those from PDD, suggest that the full dataset contains between 19 to 74  
198            species, with the best scoring estimates being 19, 20, and 30 (ASAP scores 3.5, 3.5, and 4.0,  
199            respectively). Figure 4 includes two of the three estimates with the lowest (best) ASAP scores.  
200            The estimate of 19 was omitted in the final figure due to its similarity to the 20 species estimate.  
201            In most cases, sequences that ASAP assigned to the same putative species were associated with  
202            the names of >1 *Stereum* species. Additionally, one *Stereum* species name was often assigned to  
203            two or more putative species. For example, at an ASAP score of 4, the name *S. sanguinolentum*  
204            is found in 13 different assignments, differing in percentage sequence similarity by as much as  
205            13%. Additionally, *S. hirsutum* was found in 9 different assignments, and the name *S. ostrea*  
206            (including *S. cf. ostrea*) was found in 6 different assignments.

## 207    **Discussion**

208            Our results support the hypothesis that the North American fungi that have been  
209            colloquially lumped under the name “*Stereum ostrea*” are actually at least three reproductively  
210            isolated and morphologically distinguishable species: *S. fasciatum*, *S. lobatum*, and *S.*  
211            *subtomentosum*. The inference of reproductive isolation is based on the observation that while all  
212            three species are often found growing at the same site on the same substrate, there is strong  
213            concordance between ITS sequence identity and morphology, such that they appear not to be  
214            hybridizing despite often living in sympatry. Demoulin (1985) argued that *S. fasciatum* and *S.*  
215            *lobatum* were distinct species based on differing morphology and lack of fusion while growing  
216            on the same substrate, and our results support this claim with new genetic evidence.

217            As a consequence of these new data, these three *Stereum ostrea*-like species should be  
218            again recognized as legitimate and distinct species, and we recommend that the name *S. ostrea*

Delong-Duhon SG, Bagley RK, & Forbes AA

219 no longer be used for North American collections. These three species in the midwestern and  
220 eastern North America can be reliably differentiated by a combination of three features, 1)  
221 texture of cap hairs, 2) presence and extent of concentric banding, and 3) color staining of the  
222 hymenium when bruised or wetted (Figs 2–3). Other traits such as shape and color are often too  
223 variable to be used as distinguishing characteristics on their own and should only be used to  
224 inform an ID in conjunction with the aforementioned features. Our Figures 2 and 3 along with  
225 images for each specimen on iNaturalist (Supplementary Table 1) are provided to assist future  
226 naturalists and researchers in distinguishing among these species.

227 Support for *S. ostrea* being a complex of species different in both morphology and ITS  
228 sequence endorses them as a within-genus standard for using ITS sequence divergence to  
229 develop preliminary species hypotheses for *Stereum*. ASAP clearly delineates *S. fasciatum*, *S.*  
230 *lobatum*, and *S. subtomentosum* from one another at both score levels in Figure 4, and so we  
231 suggest – at least as an initial hypothesis – that many other divisions at these same levels may  
232 also represent reproductively isolated species. If this is true even in part, the sharing of names  
233 across many putative species designations and the clustering of different names into the same  
234 designation must represent misidentification, inadequacies in the taxonomy, or more likely, both.

235 Both levels of ASAP scores maintained separation among the species treated in our North  
236 American collections, and added several sequences to each clade, many of them with different  
237 assigned names (Fig. 4). All putative *S. fasciatum* and *S. lobatum* sequences were also from  
238 collections made in the Americas, while sequences aligning with our *S. subtomentosum* clade  
239 were from collections in North America, Europe, and East Asia. *S. complicatum* sequences were  
240 from both South and North America with the exception of one enigmatic sequence from a cave  
241 in Antarctica (KC785597).

## CRYPTIC DIVERSITY IN *STEREUM*

242 Sequencing all *Stereum* more thoroughly on a global scale will be necessary to elucidate  
243 species' geographic distributions. The current spotty records likely underlie, for instance, a lack  
244 of sequence representatives for some species from their country of typification - such as *S.*  
245 *gausapatum* which is described from France but is only represented in our analysis by sequences  
246 from eastern North America. Species names may also be historically applied to the wrong taxon,  
247 so if for example we later find that *S. gausapatum* in France is genetically distinct from North  
248 American collections of the same name, an alternate name would need to be found. Additionally,  
249 there is high ITS sequence diversity – as much as 8.2% difference within-species – among  
250 putative *S. hirsutum* based on the 30 species ASAP estimate. In the two highest species  
251 estimates, *S. hirsutum* is divided into smaller groups that correlate with geographic origin, with  
252 all sequences from China and North America in their own group. This suggests the presence of  
253 cryptic species. *Stereum hirsutum* is known for its morphological variability, which has led to the  
254 typification of multiple varieties and forms (Turam et al. 2008). Further study of these *S.*  
255 *hirsutum* groups may help determine whether *S. hirsutum* is one globally widespread species, or  
256 instead a complex of morphologically similar species.

257 Importantly, ASAP and similar methods should not be used alone to make definitive  
258 conclusions about species limits, but rather as a first step informing future taxonomic work.  
259 Though we argue – based on having ground-truthed ASAP scores with our own data – that many  
260 of these putative species may be isolated from one another, we also see evidence that ASAP can  
261 be prone to error. Only one of the three highest scoring partitions recognized *S. complicatum* as a  
262 species separate from *S. hirsutum*, despite the large and consistent sequence difference (4.5–  
263 10%) and high support values for *S. complicatum* in Figure 1, and differences in geographic  
264 distribution and morphology. Though it may have problems, species delimitation using ASAP

Delong-Duhon SG, Bagley RK, & Forbes AA

265 and similar approaches like ABGD and bPTP has proved useful for making species number  
266 estimates in other taxonomically tricky taxa such as Chaitophorinae aphids, physinine snails, and  
267 inquiline wasps (Zhu et al. 2017, Ward et al. 2020, Young et al. 2021). The strength of this  
268 approach lies not in its ability to finalize species boundaries, but in its ease of use, making it  
269 easily replicable with new datasets and relatively simple to interpret results. This should  
270 make it a particularly attractive option for non-professional mycologists.

271 A more general conclusion is that an integrative approach to *Stereum* taxonomy that  
272 includes, but is not limited to, DNA sequence data will be helpful in resolving species  
273 boundaries. In most cases, original species descriptions are only a few sentences long or  
274 quite vague. Further, *Stereum* taxonomy has a long history of synonymization such that  
275 descriptions of *Stereum* species from different authors are often conflicting, as they  
276 generalize traits of multiple species. Historically, *Stereum* has been used as a genus name  
277 to describe many corticioid fungi, many of which have been transferred to other genera  
278 both in the Stereaceae and to other genetically distant families (Larsson and Larsson 2003).  
279 Many *Stereum* are still accepted as synonyms of better-known *Stereum* species, but if our  
280 study is of any indication, some of those names may also need to be resurrected.

281 Our work here demonstrates a need to explore the rest of the *Stereum* genus, in order  
282 to provide taxonomic resources for those who study other aspects of *Stereum*. Their  
283 ecological roles as parasites and wood decay fungi, as well as potential use in  
284 bioremediation and biomedicine, have made them an attractive organism for research.  
285 Molecular phylogenetic approaches will be necessary as a supplemental tool to delineate  
286 *Stereum* species, as morphology alone has proved inadequate in the past, and we predict  
287 that the key features useful in differentiating the members of the North American *S. ostrea*



## CRYPTIC DIVERSITY IN *STEREUM*

288 species complex treated here (i.e., tomentum, staining, banding) may not delineate *Stereum*  
289 species so clearly elsewhere in the world. While using a single locus was sufficient for this  
290 regional preliminary study, more loci should be included for resolving the phylogeny of *Stereum*.  
291 By using a multilocus approach and worldwide sampling strategy, we can achieve greater  
292 resolution within this genus and other members of the Stereaceae.

### 293 **Funding**

294 Financial support for this project was provided by awards to S.G.D. in the form of  
295 University of Iowa's Maureen Medberry Snell CLAS Award, two Iowa Center for Research by  
296 Undergraduates (ICRU) fellowships, and the University of Iowa Graduate Diversity Fellowship.

### 297 **Acknowledgements**

298 We thank Dr. Rosanne Healy for providing an outgroup sequence and valuable advice,  
299 and Dean Abel for his encouragement and gift of important literature on *Stereum*.

### 300 **References**

- 301 Banerjee SN. 1935. Thelephoraceae of Bengal: I. J Indian Bot Soc. 14:13–48.
- 302 Boedijn KB. 1940. The Mycetozoa, fungi and lichens of the Krakatau group. Bull Jard Bot  
303 Buitenz. 16:358–429.
- 304 Burt EA. 1920. The Thelephoraceae of North America. XII. *Stereum*. Ann Mo Bot Gard.  
305 7(2):81–248.
- 306 Buyck B, Hofstetter V. 2011. The contribution of tef-1 sequences to species delimitation in the  
307 *Cantharellus cibarius* complex in the southeastern USA. Fungal Divers. 49:35–46.

Delong-Duhon SG, Bagley RK, & Forbes AA

- 308 Čermák P, Jankovský L, Glogar, J. 2004. Progress of spreading *Stereum sanguinolentum* (Alb. et  
309 Schw.: Fr.) Fr. wound rot and its impact on the stability of spruce stands. J For Sci.  
310 50(8):360–365.
- 311 Chamuris GP. 1985. On distinguishing *Stereum gausapatum* from the ‘*S. hirsutum*-Complex’.  
312 Mycotaxon. 22:1–12.
- 313 Chamuris GP. 1988. The non-stipitate stereoid fungi in the north-eastern United States and  
314 adjacent Canada. Mycologia Mem. 14:1–247.
- 315 Chen H, Rangasamy M, Tan SY, Wang H, Siegfried BD. 2010. Evaluation of Five Methods for  
316 Total DNA Extraction from Western Corn Rootworm Beetles. PLoS ONE. 5(8):1-6.
- 317 Cooke MC. 1892. A Handbook of Australian Fungi. London (England): Williams and Norgate.
- 318 Couch BC, Kohn LM. 2002. A multilocus gene genealogy concordant with host preference  
319 indicates segregation of a new species, *Magnaporthe oryzae*, from *M. grisea*. Mycologia.  
320 94(4):683–693.
- 321 Demoulin V. 1985. *Stereum fasciatum* (Schw.) Fr. and *S. lobatum* (Kunze:Fr.) Fr.: Two Distinct  
322 Species. Mycotaxon. 23:207–17.
- 323 Doljak B, Cateni F, Anderluh M, Procida G, Zilic J, Zacchigna M. 2006. Glycerolipids as  
324 selective thrombin inhibitors from the fungus *Stereum hirsutum*. Drug Dev Ind Pharm.  
325 32(5):635–643.
- 326 Eicker A, Louw S. 1998. *Stereum* species (Stereaceae) of South Africa. S Afr J Bot. 64(1):30–  
327 37.

CRYPTIC DIVERSITY IN *STEREUM*

- 328 Gardes M, Bruns TD. 1993. ITS primers with enhanced specificity for basidiomycetes -  
329 application to the identification of mycorrhizae and rusts. *Mol Ecol.* 2(2):113–118.
- 330 Geml J, Laursen GA, O’Neill K, Nusbaum HC, Taylor DL. 2006. Beringian origins and cryptic  
331 speciation events in the fly agaric (*Amanita muscaria*). *Mol Ecol.* 15(1):225–239.
- 332 Ginns J, Lefebvre MNL. 1993. Lignicolous corticioid fungi (Basidiomycota) of North America.  
333 Systematics, distribution, and ecology. *Mycologia Mem.* 19:1–247.
- 334 Hawksworth DL, Lücking R. 2017. Fungal diversity revisited: 2.2 to 3.8 million species. In: J.  
335 Heitman, B. Howlett, P. Crous, E. Stukenbrock, T. James, and N. Gow, editors. *The*  
336 *Fungal Kingdom*. Washington (DC): ASM Press. p. 79–95.
- 337 Hendrickx FL. 1948. *Sylloge Fungorum Congensium*. Inst Natl pour l’Etude Agron Congo Belge  
338 Pubs. 35:1–216.
- 339 Höhnelt FXR von, Litschauer V. 1907. Beiträge zur Kenntnis der Corticieen: II. Sitzber K Akad  
340 Wiss Math-naturw Kl. I. 116:739–852.
- 341 Hybelhauerová S, Sejbal J, Dračínský M, Hahnová A, Kontek B. 2008. Chemical constituents of  
342 *Stereum subtomentosum* and two other birch-associated Basidiomycetes: An interspecies  
343 comparative study. *Chem Biodivers.* 5(5):743–750.
- 344 Katoh K, Misawa K, Kuma K, Miyata T. 2002. MAFFT: a novel method for rapid multiple  
345 sequence alignment based on fast fourier transform. *Nucleic Acids Res.* 30:3059–3066.
- 346 Larsson E, Larsson KH. 2003. Phylogenetic relationships of russuloid basidiomycetes with  
347 emphasis on aphylophoralean taxa. *Mycologia.* 95(6):1037–1065.

Delong-Duhon SG, Bagley RK, & Forbes AA

- 348 Lentz PL. 1955. *Stereum* and allied genera of fungi in the Upper Mississippi Valley. Washington  
349 (DC): United States Department of Agriculture.
- 350 Lloyd CG. 1913. Synopsis of the Stipitate *Stereums*. Mycol Writ 4:13–44.
- 351 Masee G. 1890. A Monograph of the Thelephoreae - Part II. J Linn Soc Lond Bot. 27(181):95–  
352 112.
- 353 Miller MA, Pfeiffer W, Schwartz T. 2010. Creating the CIPRES Science Gateway for inference  
354 of large phylogenetic trees. In: Proceedings of the Gateway Computing Environments  
355 Workshop (GCE). 14 November 2010. New Orleans (LA). p. 1–8.
- 356 Peintner U, Kuhnert-Finkernagel R, Wille V, Biasioli F, Shiryayev A, Perini C. 2019. How to  
357 resolve cryptic species of polypores: An example in *Fomes*. IMA Fungus. 10:1–21.
- 358 Pilát A. 1930. Monographie der europäischen Stereaceen. Hedwigia. 70:10–132.
- 359 Pouzar Z. 1964. *Stereum subtomentosum* sp. nov. - pevník plstnatý a jeho systematické vztahy.  
360 Česká Mykol. 18:147–156.
- 361 Reinking OA. 1920. Higher basidiomycetes from the Philippines and their hosts, II. Philipp J  
362 Sci. 16:167–179.
- 363 Ronquist F, Teslenko M, van der Mark P, Ayres D, Darling A, Höhna S, Larget B, Liu L,  
364 Suchard MA, Huelsenbeck JP. 2012. MrBayes 3.2: Efficient Bayesian phylogenetic  
365 inference and model choice across a large model space. Syst Biol. 61:539–542.
- 366 Seitzman BH, Ouimette A, Mixon RL, Hobbie EA, Hibbett DS. 2011. Conservation of biotrophy  
367 in Hygrophoraceae inferred from combined stable isotope and phylogenetic analyses.  
368 Mycologia. 103(2): 280–290.

CRYPTIC DIVERSITY IN *STEREUM*

- 369 Stamatakis A. 2014. RAxML version 8: a tool for phylogenetic analysis and post-analysis of  
370 large phylogenies. *Bioinformatics*. 30:1312–1313.
- 371 Stenlid J, Vasiliauskas R. 1998. Genetic diversity within and among vegetative compatibility  
372 groups of *Stereum sanguinolentum* determined by arbitrary primed PCR. *Mol Ecol*.  
373 7:1265–1274.
- 374 Tian M, Zhao P, Li G, Zhang K. 2020. In Depth Natural Product Discovery from the  
375 Basidiomycetes *Stereum* Species. *Microorganisms*. 8:1049.
- 376 Turam D, Zmitrovitch IV, Wasser SP, Nevo E. 2008. The Genus *Stereum* in Israel. *Mycotaxon*.  
377 106: 109–126.
- 378 Vu D, Szöke S, Wiwie C, Baumbach J, Cardinali G, Röttger R, Robert V. 2015. Massive fungal  
379 biodiversity data re-annotation with multi-level clustering. *Sci Rep* 4, 6837.
- 380 Ward AKG, Sheikh SI, Forbes AA. 2020. Diversity, Host Ranges, and Potential Drivers of  
381 Speciation among the Inquiline Enemies of Oak Gall Wasps (Hymenoptera: Cynipidae).  
382 *Insect Sys Divers*. 4(6): 1–13.
- 383 Welden AL. 1971. An essay on *Stereum*. *Mycologia* 63:790–799.
- 384 White TJ, Bruns TD, Lee SB, Taylor JW. 1990. Amplification and direct sequencing of fungal  
385 ribosomal RNA genes for phylogenetics. In: Innis MA, Gelfand DH, Sninsky JJ, White  
386 TJ, eds. *PCR protocols: a guide to methods and applications*. Academic Press, San Diego.  
387 p. 315–322.
- 388 Wibberg D, Stadler M, Lambert C, Bunk B, Spröer C, Rückert C, Kalinowski J, Cox RJ, Kuhnert  
389 E. 2021. High quality genome sequences of thirteen Hypoxylaceae (Ascomycota)

Delong-Duhon SG, Bagley RK, & Forbes AA

390 strengthen the phylogenetic family backbone and enable the discovery of new taxa.

391 Fungal Divers. 106(1): 7–28.

392 Young MK, Smith R, Pilgrim KL, Schwartz MK. 2021. Molecular species delimitation refines

393 the taxonomy of native and nonnative physinine snails in North America. *Sci Rep.* 11:

394 21739.

395 Zhu X-C, Chen J, Chen R, Jiang L-Y, Qiao G-X. 2017. DNA barcoding and species delimitation

396 of Chaitophorinae (Hemiptera, Aphididae). *ZooKeys.* 656: 25–50.

397

398

399

400

401

402

403

404

405

406

407

## CRYPTIC DIVERSITY IN *STEREUM*

408 **Figure 1** – Maximum likelihood phylogeny of *Stereum* collections generated from ITS sequence  
409 data. Bootstrap values are above branches. Scale bar represents the number of nucleotide  
410 changes per site. The topmost three clades show strong support, suggesting three distinct  
411 members of the *Stereum ostrea* species complex in midwestern and eastern North America,  
412 which we identify here as *S. fasciatum*, *S. lobatum*, and *S. subtomentosum*, based on  
413 morphological differences (Fig. 2 & 3).

414 **Figure 2** – Morphological comparison of a-c) *Stereum subtomentosum*, d-f) *S. fasciatum*, g-i) *S.*  
415 *lobatum*. Respectively, the columns show wide views of the basidiocarps, magnified views of the  
416 tomentum texture, and cross sections. *S. subtomentosum* tomentum is long, wooly and tufted, *S.*  
417 *fasciatum* tomentum is coarse and clumped in tufts, and *S. lobatum* tomentum is short, matted,  
418 and felted. Note that cap hair is best viewed under magnification.

419 **Figure 3** – Comparison of color staining between a) *S. fasciatum* and b) *S. lobatum*, which show  
420 slight darkening, and bright yellow staining, respectively. *S. subtomentosum* (not shown) exhibits  
421 the same bright yellow staining as *S. lobatum*. Note that both specimens were dry, and re-wetted  
422 to investigate color staining.

423 **Figure 4** – ASAP species delimitation results for 460 *Stereum* ITS sequences (see  
424 Supplementary Figure 2 for full results). Best scoring estimates – which also sorted our own  
425 collections from Figure 1 correctly by species – resulted in estimates of 20 (ASAP score = 3.5)  
426 or 30 (ASAP score = 4.0) species, depicted by the colored boxes in either column. Numbers in  
427 each box represent the number of sequences for each named species (one if blank). Box size does  
428 not accord with sequence number. Identification and Country/Region data summarizes metadata  
429 for each species. Names highlighted in green represent our own collections reported in Figure 1,  
430 and names highlighted in blue represent names confirmed with photographic evidence. The

Delong-Duhon SG, Bagley RK, & Forbes AA

431 dendrogram to the left is provided only as a preliminary estimate of relationships among ITS  
432 sequences.
